# Supplementary material for: An integrative analysis of tissue-specific transcriptomic and metabolomic responses to short-term dietary methionine restriction in mice
Source: PLoS One. 2017 May 16;12(5):e0177513. doi: 10.1371/journal.pone.0177513 (PMC5433721; doi:10.1371/journal.pone.0177513)
Supplement: S2 Table — Pathways with a false discovery rate (q-value) < 10% are shown. Column descriptors are as follows: Name, Name of KEGG pathway; Size, Number of genes contained in pathway; NES, Normalized enrichment score, a GSEA derived metric normalized for pathway size and reflecting the degree of pathway enrichment; NOM p-val, nominal GSEA p-value derived from gene-label permutations; FDR q-value, false discovery rate estimate; Direction, direction of pathway enrichment in MR or control samples; Tissue, tissue where pathway was identified. (XLS) [file pone.0177513.s003.xls]

## Sheet: Supp Table 2_topgseapathways
NAME	SIZE	NES	NOM p-val	FDR q-val	Direction	Tissue
KEGG_FOCAL_ADHESION	171	-2.23729	0	0	Dn_MR	IWAT
KEGG_ECM_RECEPTOR_INTERACTION	63	-2.18844	0	0	Dn_MR	IWAT
KEGG_BASAL_CELL_CARCINOMA	39	-2.05694	0	0.000720742	Dn_MR	IWAT
KEGG_CYTOKINE_CYTOKINE_RECEPTOR_INTERACTION	161	-1.97223	0	0.00202226	Dn_MR	IWAT
KEGG_TIGHT_JUNCTION	101	-1.73216	0	0.0401015	Dn_MR	IWAT
KEGG_MELANOMA	54	-1.73359	0.00183824	0.0454069	Dn_MR	IWAT
KEGG_HYPERTROPHIC_CARDIOMYOPATHY_HCM	63	-1.7425	0.00366972	0.0484042	Dn_MR	IWAT
KEGG_REGULATION_OF_ACTIN_CYTOSKELETON	167	-1.70351	0	0.0498326	Dn_MR	IWAT
KEGG_PROSTATE_CANCER	84	-1.67037	0.00184162	0.0505312	Dn_MR	IWAT
KEGG_AXON_GUIDANCE	108	-1.68692	0	0.0520294	Dn_MR	IWAT
KEGG_GLYCOSAMINOGLYCAN_BIOSYNTHESIS_CHONDROITIN_SULFATE	18	-1.67619	0.00695652	0.052749	Dn_MR	IWAT
KEGG_GLYCOSPHINGOLIPID_BIOSYNTHESIS_GLOBO_SERIES	10	-1.64742	0.0131827	0.0528681	Dn_MR	IWAT
KEGG_HEDGEHOG_SIGNALING_PATHWAY	32	-1.6554	0.0116279	0.0531302	Dn_MR	IWAT
KEGG_COMPLEMENT_AND_COAGULATION_CASCADES	52	-1.74824	0.00186916	0.0538852	Dn_MR	IWAT
KEGG_DILATED_CARDIOMYOPATHY	68	-1.61911	0.00367647	0.0653054	Dn_MR	IWAT
KEGG_ADHERENS_JUNCTION	68	-1.59917	0.00722022	0.068658	Dn_MR	IWAT
KEGG_LEUKOCYTE_TRANSENDOTHELIAL_MIGRATION	93	-1.60374	0.00763359	0.0703574	Dn_MR	IWAT
KEGG_MELANOGENESIS	78	-1.55908	0.00731261	0.0863126	Dn_MR	IWAT
KEGG_ARRHYTHMOGENIC_RIGHT_VENTRICULAR_CARDIOMYOPATHY_ARVC	55	-1.56027	0.0152964	0.0902082	Dn_MR	IWAT
KEGG_MATURITY_ONSET_DIABETES_OF_THE_YOUNG	10	-1.54614	0.0469925	0.091209	Dn_MR	IWAT
KEGG_OXIDATIVE_PHOSPHORYLATION	95	3.00014	0	0	Up_MR	IWAT
KEGG_PARKINSONS_DISEASE	92	2.93433	0	0	Up_MR	IWAT
KEGG_CITRATE_CYCLE_TCA_CYCLE	28	2.76126	0	0	Up_MR	IWAT
KEGG_HUNTINGTONS_DISEASE	143	2.67582	0	0	Up_MR	IWAT
KEGG_PYRUVATE_METABOLISM	34	2.54503	0	0	Up_MR	IWAT
KEGG_PROPANOATE_METABOLISM	29	2.50805	0	0	Up_MR	IWAT
KEGG_ALZHEIMERS_DISEASE	130	2.44792	0	0	Up_MR	IWAT
KEGG_GLYCOLYSIS_GLUCONEOGENESIS	49	2.34828	0	0	Up_MR	IWAT
KEGG_PEROXISOME	75	2.26266	0	0	Up_MR	IWAT
KEGG_VALINE_LEUCINE_AND_ISOLEUCINE_DEGRADATION	41	2.24428	0	0	Up_MR	IWAT
KEGG_FATTY_ACID_METABOLISM	36	2.21972	0	0	Up_MR	IWAT
KEGG_PENTOSE_PHOSPHATE_PATHWAY	22	2.13723	0	0.000159022	Up_MR	IWAT
KEGG_AMINOACYL_TRNA_BIOSYNTHESIS	40	2.03625	0	0.000878398	Up_MR	IWAT
KEGG_BUTANOATE_METABOLISM	28	1.97206	0	0.00190311	Up_MR	IWAT
KEGG_FRUCTOSE_AND_MANNOSE_METABOLISM	33	1.95587	0	0.00215422	Up_MR	IWAT
KEGG_CARDIAC_MUSCLE_CONTRACTION	52	1.8406	0	0.00708361	Up_MR	IWAT
KEGG_TERPENOID_BACKBONE_BIOSYNTHESIS	13	1.78093	0.0107296	0.0114744	Up_MR	IWAT
KEGG_LIMONENE_AND_PINENE_DEGRADATION	10	1.73555	0.0136674	0.0174025	Up_MR	IWAT
KEGG_PPAR_SIGNALING_PATHWAY	59	1.72508	0.0045977	0.0184762	Up_MR	IWAT
KEGG_BIOSYNTHESIS_OF_UNSATURATED_FATTY_ACIDS	19	1.71912	0	0.018839	Up_MR	IWAT
KEGG_TRYPTOPHAN_METABOLISM	32	1.65714	0.0153173	0.0317415	Up_MR	IWAT
KEGG_GLYCEROPHOSPHOLIPID_METABOLISM	60	1.61695	0.00440529	0.0431198	Up_MR	IWAT
KEGG_VALINE_LEUCINE_AND_ISOLEUCINE_BIOSYNTHESIS	10	1.57547	0.0344086	0.0560729	Up_MR	IWAT
KEGG_GLYCEROLIPID_METABOLISM	38	1.53457	0.0321101	0.064435	Up_MR	IWAT
KEGG_LYSINE_DEGRADATION	43	1.53771	0.01566	0.0655835	Up_MR	IWAT
KEGG_GALACTOSE_METABOLISM	21	1.53967	0.0267857	0.0671587	Up_MR	IWAT
KEGG_INSULIN_SIGNALING_PATHWAY	124	1.53976	0.00218818	0.0698451	Up_MR	IWAT
KEGG_ADIPOCYTOKINE_SIGNALING_PATHWAY	59	1.51335	0.00419287	0.0733299	Up_MR	IWAT
KEGG_STEROID_BIOSYNTHESIS	15	1.49693	0.0681818	0.0792764	Up_MR	IWAT
KEGG_STARCH_AND_SUCROSE_METABOLISM	29	1.46165	0.0604027	0.099406	Up_MR	IWAT
KEGG_TYPE_I_DIABETES_MELLITUS	20	-1.86017	0	0.0403147	Dn_MR	Liver
KEGG_COMPLEMENT_AND_COAGULATION_CASCADES	60	-1.87196	0.00176991	0.0704935	Dn_MR	Liver
KEGG_PROPANOATE_METABOLISM	28	-1.71742	0.00965251	0.077928	Dn_MR	Liver
KEGG_GRAFT_VERSUS_HOST_DISEASE	17	-1.75131	0.00187617	0.0907698	Dn_MR	Liver
KEGG_AUTOIMMUNE_THYROID_DISEASE	16	-1.7205	0.00589391	0.0946959	Dn_MR	Liver
KEGG_STEROID_BIOSYNTHESIS	15	2.00263	0	0.0161787	Up_MR	BAT
KEGG_ECM_RECEPTOR_INTERACTION	70	-2.30959	0	0	Dn_MR	Muscle
KEGG_PROPANOATE_METABOLISM	29	-1.86149	0.0021097	0.0585273	Dn_MR	Muscle
